# Supplementary material for: Interface-enhanced Li ion conduction in a LiBH4–SiO2 solid electrolyte
Source: Royal Society of Chemistry journal article supplement (doi:10.1039/c6cp03563a), 2016-01-01
Supplement: c6cp03563a1.pdf [file c6cp03563a1.pdf]

# **Interface-enhanced Li ion conduction in $\text{LiBH}_4\text{-SiO}_2$ solid electrolyte**

**Yong Seok Choi,<sup>a,b</sup> Young-Su Lee,<sup>a,\*</sup> Kyu Hwan Oh,<sup>b</sup> Young Whan Cho<sup>a</sup>**

*<sup>a</sup>High Temperature Energy Materials Research Center, Korea Institute of Science and Technology, Seoul 02792, Republic of Korea*

*<sup>b</sup>Department of Materials Science and Engineering, Seoul National University, Seoul 08826, Republic of Korea*

\* Corresponding author.

E-mail: lee0su@kist.re.kr

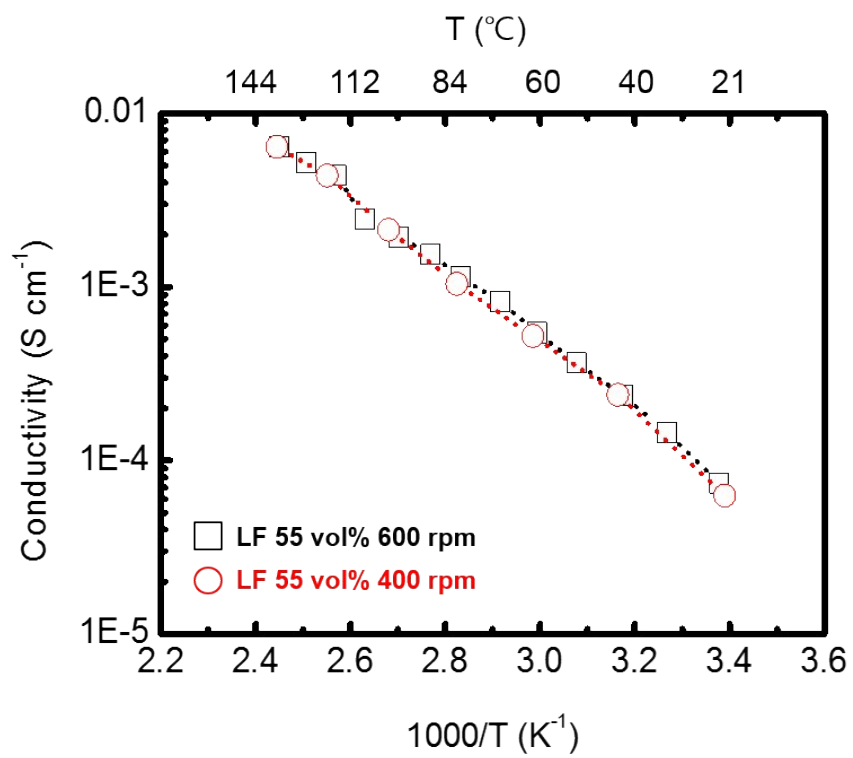

**Figure S1.** Arrhenius plots of the ionic conductivities of ball-milled LF 55 vol.% sample at 600 rpm and 400 rpm.

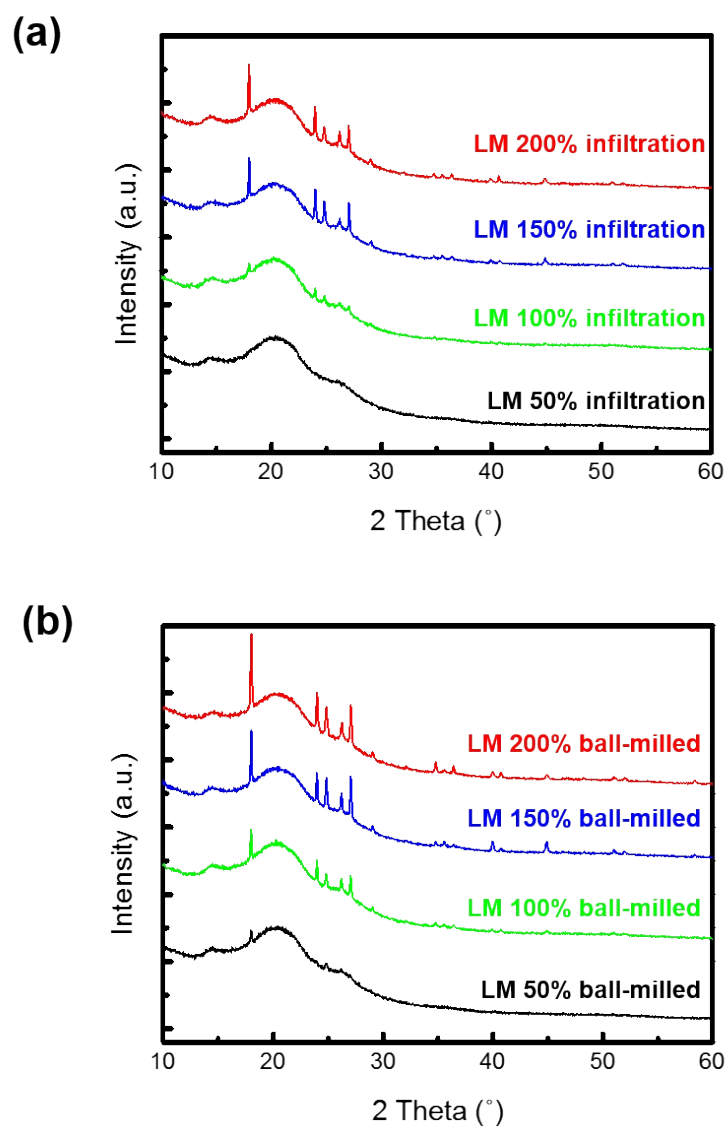

**Figure S2.** X-ray diffraction patterns of (a) infiltrated and (b) ball-milled LM composites in different mixing ratios.

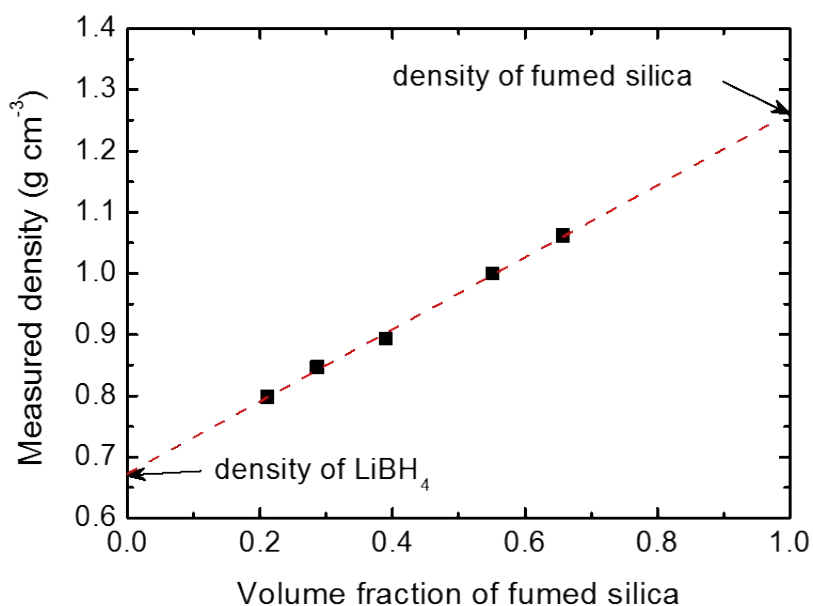

**Figure S3.** Starting from the initial densities of  $\text{LiBH}_4$  and fumed silica of  $0.61$  and  $1.24 \text{ g cm}^{-3}$ , respectively, an iterative procedure was applied to adjust the reference densities. At each iteration, volume fractions were calculated using the input densities and a linear regression was performed for the measured density vs. volume fraction plot. The densities at  $x = 0$  and  $x = 1$  correspond to the output density of  $\text{LiBH}_4$  and fumed silica, respectively. The procedure was repeated until the input and output densities become identical. The results were converged after four runs, and the graph shows the values at the fourth run. The 77 vol.% data point was excluded in the fitting procedure.

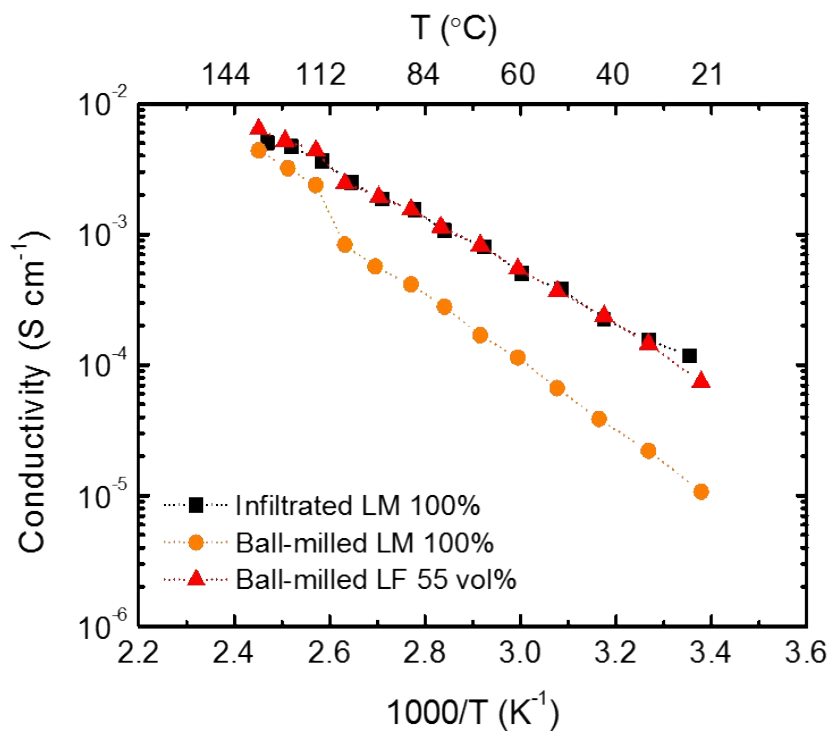

**Figure S4.** Comparison of the ionic conductivities of LM and LF mixture which exhibits the maximum conductivity among each set of mixtures.

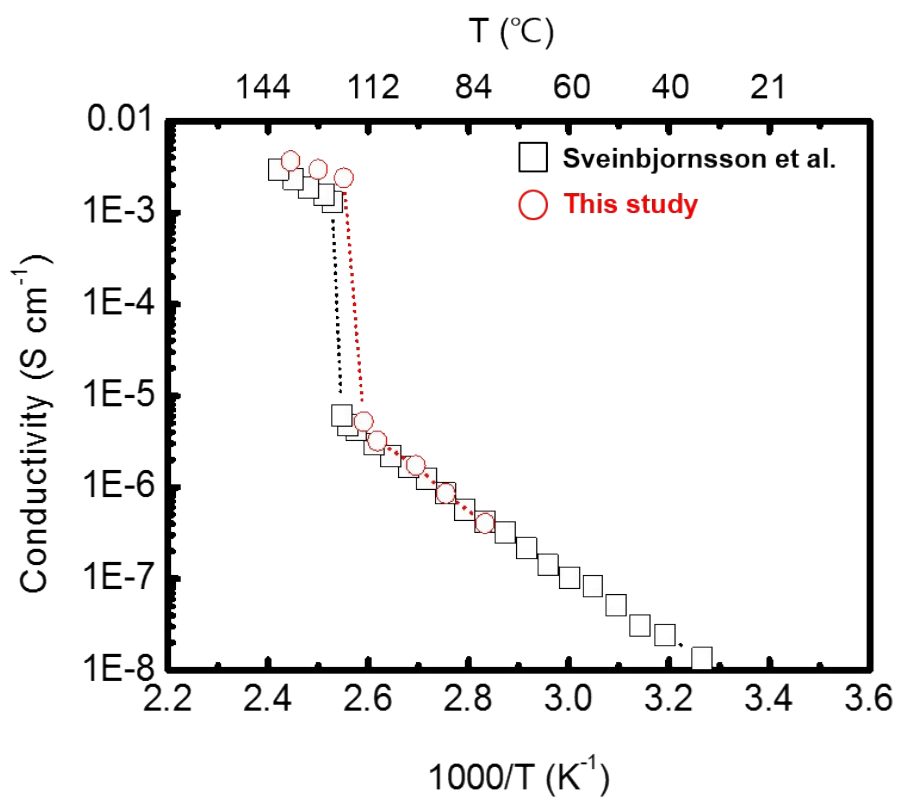

**Figure S5.** Comparison of the ionic conductivities of pure LiBH<sub>4</sub> in this study and by Sveinbjörnsson et al. (Ref. [40] in the main text)

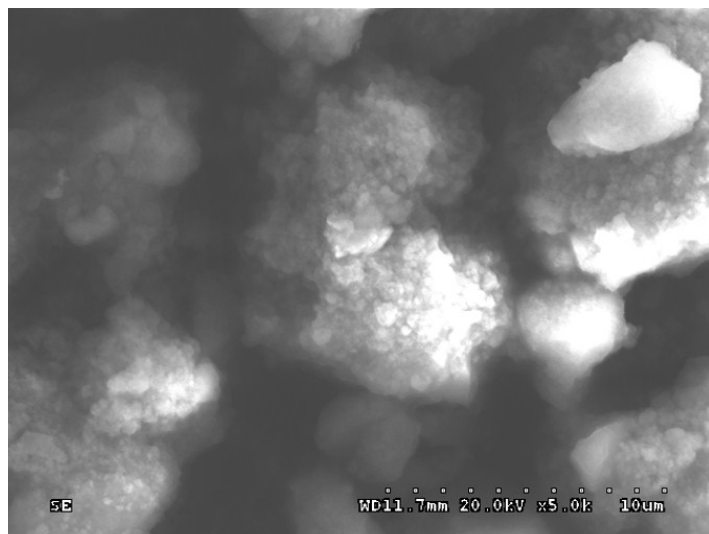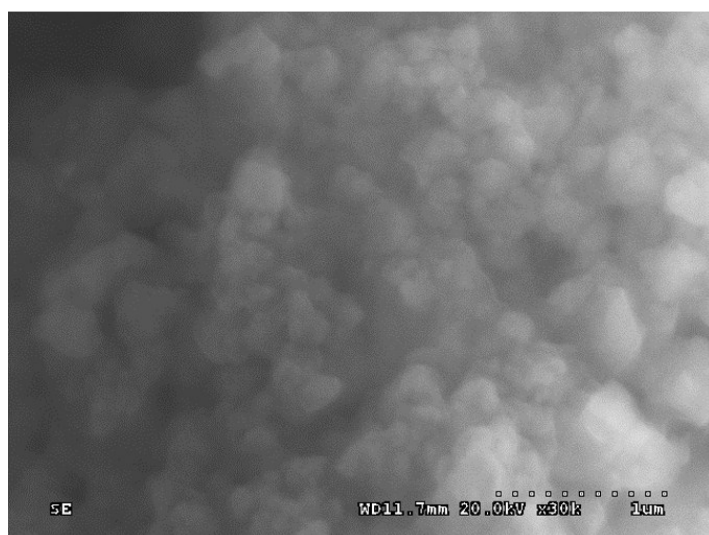

**Figure S6.** SEM images of ball-milled MCM-41.

**Table S1.** Summary of wt.% and vol.% of SiO<sub>2</sub> in the LM or LF mixtures used in the present study. The number in the parenthesis has relatively large uncertainty.

Infiltrated LM mixtures

|                      |      |      |      |      |
|----------------------|------|------|------|------|
| Pore volume %        | 200  | 150  | 100  | 50   |
| wt% SiO <sub>2</sub> | 43.9 | 52.1 | 61.0 | 75.8 |

Ball-milled LM mixtures

|                       |      |      |      |      |
|-----------------------|------|------|------|------|
| Pore volume %         | 200  | 150  | 100  | 50   |
| wt% SiO <sub>2</sub>  | 43.9 | 52.1 | 61.0 | 75.8 |
| vol% SiO <sub>2</sub> | 26.6 | 33.6 | 42.1 | 59.2 |

Ball-milled LF mixtures

|                       |      |      |      |      |      |        |
|-----------------------|------|------|------|------|------|--------|
| wt% SiO <sub>2</sub>  | 33.3 | 42.9 | 54.5 | 69.7 | 78.3 | 86.2   |
| vol% SiO <sub>2</sub> | 21.1 | 28.6 | 39.0 | 55.1 | 65.8 | (76.9) |
